# Supplementary material for: Uncovering microbiomes of the rice phyllosphere using long-read metagenomic sequencing
Source: PubMed Central journal article supplement (PMC10973392; doi:10.1038/s42003-024-05998-w), 2024-03-27
Supplement: 42003_2024_5998_MOESM3_ESM.pdf [file 42003_2024_5998_MOESM3_ESM.pdf]

## **Description of Additional Supplementary Files**

**File name:** Supplementary Data

**Description:** The source data behind the Figures and tables.
